# Supplementary material for: Effect of the Inoculum-to-Substrate Ratio on Putative Pathogens and Microbial Kinetics during the Batch Anaerobic Digestion of Simulated Food Waste
Source: MDPI journal article supplement (doi:10.3390/microorganisms12030603), 2024-03-18
Supplement: s1 [file s1]

## **Supplementary material**

### **Effect of inoculum to substrate ratio on putative pathogens and microbial kinetics during batch anaerobic digestion of simulated food waste**

**Saanu Victoria Otite <sup>1</sup>, Bhushan P. Gandhi <sup>2</sup>, Esther Agyabeng Fofie <sup>1</sup>, Alfonso José Lag-Brotons <sup>2</sup>, Lawrence I. Ezemonye <sup>3,4</sup>, Alastair D. Martin <sup>2</sup>, Roger W. Pickup <sup>5</sup> and Kirk T. Semple <sup>1,\*</sup>**

<sup>1</sup> Lancaster Environment Centre, Library Avenue, Lancaster University, Lancaster, LA1 4YQ, UK

<sup>2</sup> Engineering Department, Gillow Avenue, Lancaster University, Lancaster, LA1 4YW, UK

<sup>3</sup> Centre for Global Eco-innovation Nigeria, University of Benin, Benin City, Edo State, PMB 300313, Nigeria

<sup>4</sup> Igbinedion University Okada, Benin City, Edo State, PMB 0006, Nigeria

<sup>5</sup> Division of Biomedical and Life Sciences, Furness Building, Lancaster University, Lancaster, LA1 4YG, UK

\* Correspondence: k.semple@lancaster.ac.uk; Tel.: +44 (0)1524 510554

**Table S1:** Recipe for simulated food waste used in the batch AD process based on household food waste in the UK (WRAP, UK (Ventour, 2008)). Culled from Gandhi *et al.* (2022)

| Household food waste in UK<br>(WRAP, 2007) |                           | Simulated household food waste                |                           |
|--------------------------------------------|---------------------------|-----------------------------------------------|---------------------------|
| Food group                                 | % Weight<br>(fresh basis) | Food group                                    | % Weight<br>(fresh basis) |
| Bakery                                     | 13.4%                     | Sainsbury's Plain Naan                        | 13.80%                    |
| Vegetables                                 | 25.8%                     | Bird Eye Mixed Vegetables                     | 26.57%                    |
| Mixed foods                                | 10.5%                     | Sainsbury's Fish Pie                          | 10.81%                    |
| Fruit                                      | 16.4%                     | Sainsbury's Fruit Platter                     | 16.89%                    |
| Meat and fish                              | 8.4%                      | Sainsbury Beef Mince 12% Fat                  | 8.65%                     |
| Salad                                      | 4.4%                      | Sainsbury's Bisto Salad                       | 4.53%                     |
| Dairy                                      | 3.5%                      | Sainsbury's Woodland Free<br>Range Large Eggs | 3.61%                     |
| Dried food                                 | 2.5%                      | Sainsbury's Penne                             | 2.58%                     |
| Drinks                                     | 8.0%                      | Summerfruits Juice Drinks                     | 8.24%                     |
| Condiments                                 | 2.4%                      | Heinz Tomato Ketchup                          | 2.4%                      |
| Confectionery                              | 1.0%                      | Cadbury Dairy Milk Chocolate                  | 1.0%                      |
| Desserts                                   | 0.8%                      | Bramley Apple Pies                            | 0.8%                      |
| Other                                      | 3.0%                      | -----                                         | -----                     |
| Total                                      | 100%                      | Total                                         | 100%                      |

**Table S2:** Substrate (simulated food waste) and inoculum characteristics (mean  $\pm$  standard deviation) Culled from Gandhi *et al.* (2022)

| Parameter                                            | Substrate        | Inoculum         |
|------------------------------------------------------|------------------|------------------|
| pH                                                   | 5.80 $\pm$ 0.00  | 8.64 $\pm$ 0.01  |
| TS (%)                                               | 19.75 $\pm$ 0.09 | 6.58 $\pm$ 0.08  |
| VS (% dry basis)                                     | 94.97 $\pm$ 0.11 | 60.87 $\pm$ 0.29 |
| VS (% wet basis)                                     | 18.75 $\pm$ 0.09 | 4.01 $\pm$ 0.05  |
| Carbohydrates (% wet basis)                          | 11.16 $\pm$ 0.16 | 0.48 $\pm$ 0.05  |
| Proteins (% wet basis)                               | 3.21 $\pm$ 0.06  | 1. 61 $\pm$ 0.04 |
| Lipids (% wet basis)                                 | 2.64 $\pm$ 0.01  | 0.69 $\pm$ 0.04  |
| Total VFAs (g/l)                                     | 4.49 $\pm$ 0.14  | 0.74 $\pm$ 0.06  |
| Total ammonia nitrogen (mg/l)                        | 124 $\pm$ 12     | 4223 $\pm$ 19    |
| Partial alkalinity (as, g CaCO <sub>3</sub> /l)      | 0.36 $\pm$ 0.07  | 17.38 $\pm$ 0.05 |
| Intermediate alkalinity (as, g CaCO <sub>3</sub> /l) | 2.08 $\pm$ 0.06  | 4.82 $\pm$ 0.06  |
| Total alkalinity (as, g CaCO <sub>3</sub> /l)        | 3.08 $\pm$ 0.14  | 22.76 $\pm$ 0.04 |
| Cellulose (% dry basis)                              | 4.01 $\pm$ 0.18  | 9.27 $\pm$ 0.43  |
| Lignin (% dry basis)                                 | 7.16 $\pm$ 0.44  | 12.20 $\pm$ 0.02 |
| C (% dry basis)                                      | 47.32 $\pm$ 0.23 | 34.27 $\pm$ 0.09 |
| H (% dry basis)                                      | 6.75 $\pm$ 0.04  | 4.71 $\pm$ 0.02  |
| N (% dry basis)                                      | 3.42 $\pm$ 0.02  | 4.37 $\pm$ 0.02  |
| S (% dry basis)                                      | 0.37 $\pm$ 0.08  | 0.82 $\pm$ 0.02  |

Table S3. Primers used for *q*PCR

| Target group | Primer name      | Target region | Sequence                                                  | Amplicon size |
|--------------|------------------|---------------|-----------------------------------------------------------|---------------|
| Bacteria     | 341 F<br>806 R   | 16S<br>rRNA   | CCTACGGGAGGCAGCAG<br>GGACTACHVGGGTWTCTAAT                 | 434           |
| Fungi        | Lwin F<br>Lwin R | ITS1          | GAGGAAGTAAAAGTCGTAACAAGGTTTC<br>CAAATTCACAAAGGGTAGGATGATT | 120           |
| Methanogens  | Met1 F<br>Met1 R | 16S<br>rRNA   | GGATTAGATACCCSGGTAGT<br>GTTGARTCCAATTAAACCGCA             | 191           |

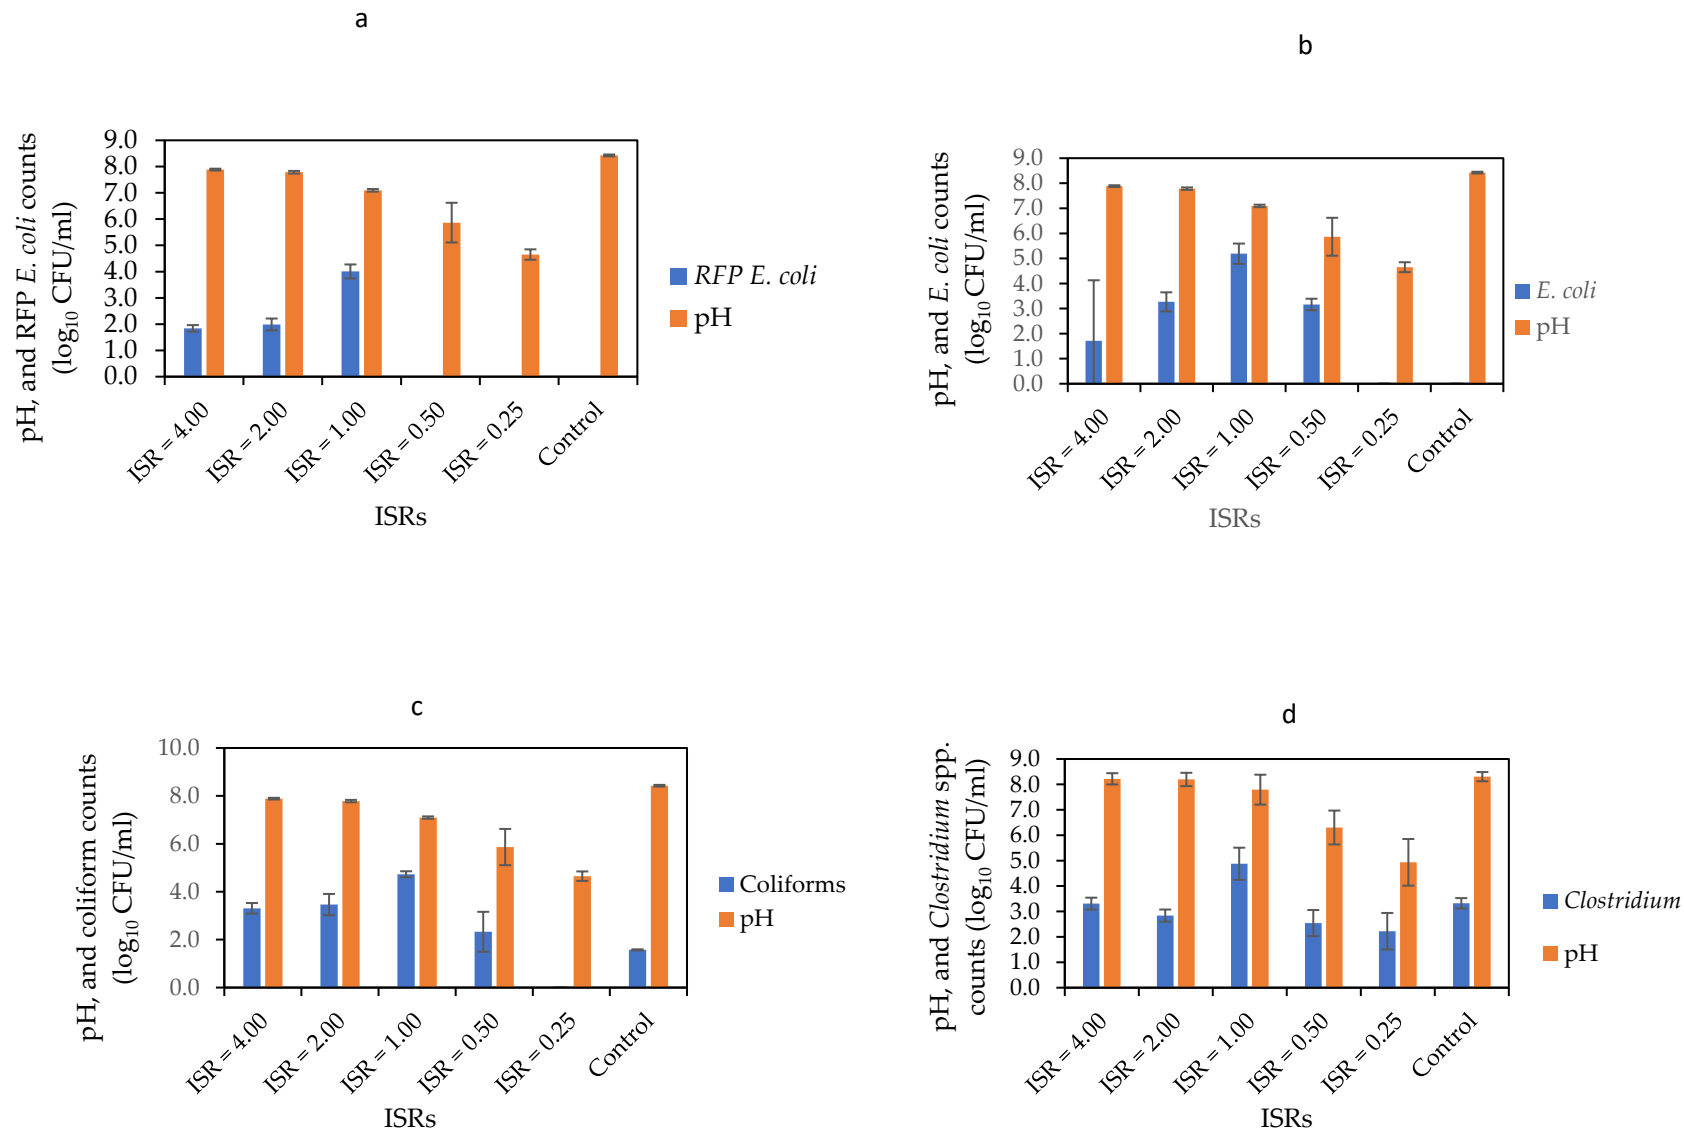

Figure S1: Effect of ISR on pH and bacterial counts showing how ISR influenced pH which in turn determined the inactivation of RFP-labelled *E. coli* (a) resident *E. coli* (b) coliforms (c) and *Clostridium* (d) during the first 3 days of AD. Data points are mean and standard deviation of pH and bacterial counts obtained during the first 3 days of AD.
